# Supplementary material
Source: PubMed Central journal article supplement (PMC5505479)

Fig 2a

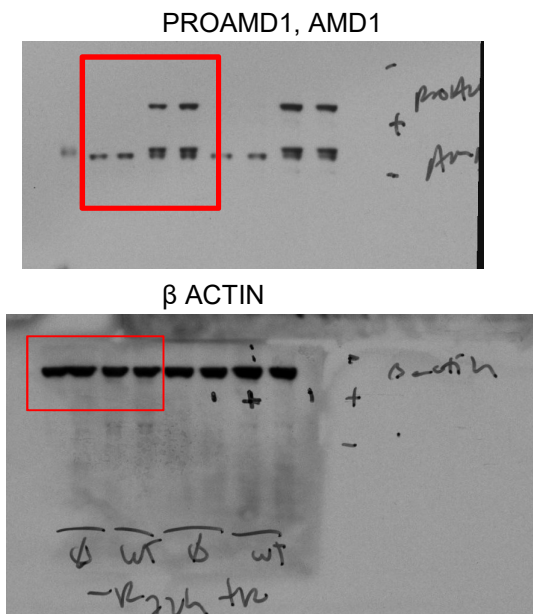

Fig 2e

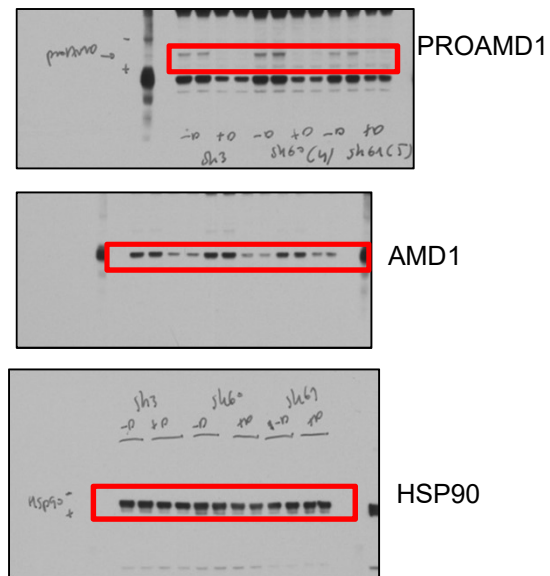

Fig 3a

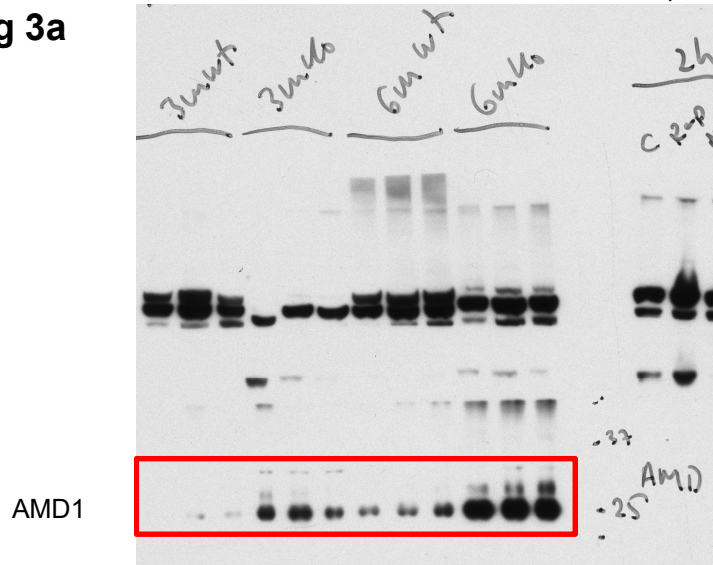

P-AKT

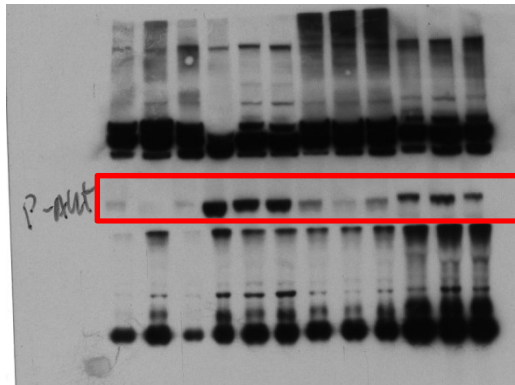

B-ACTIN

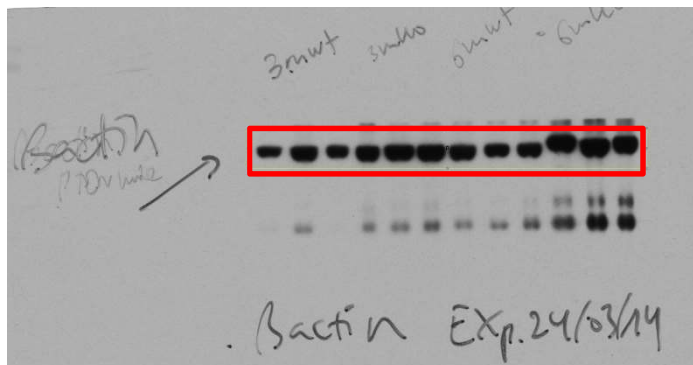

Fig 3b

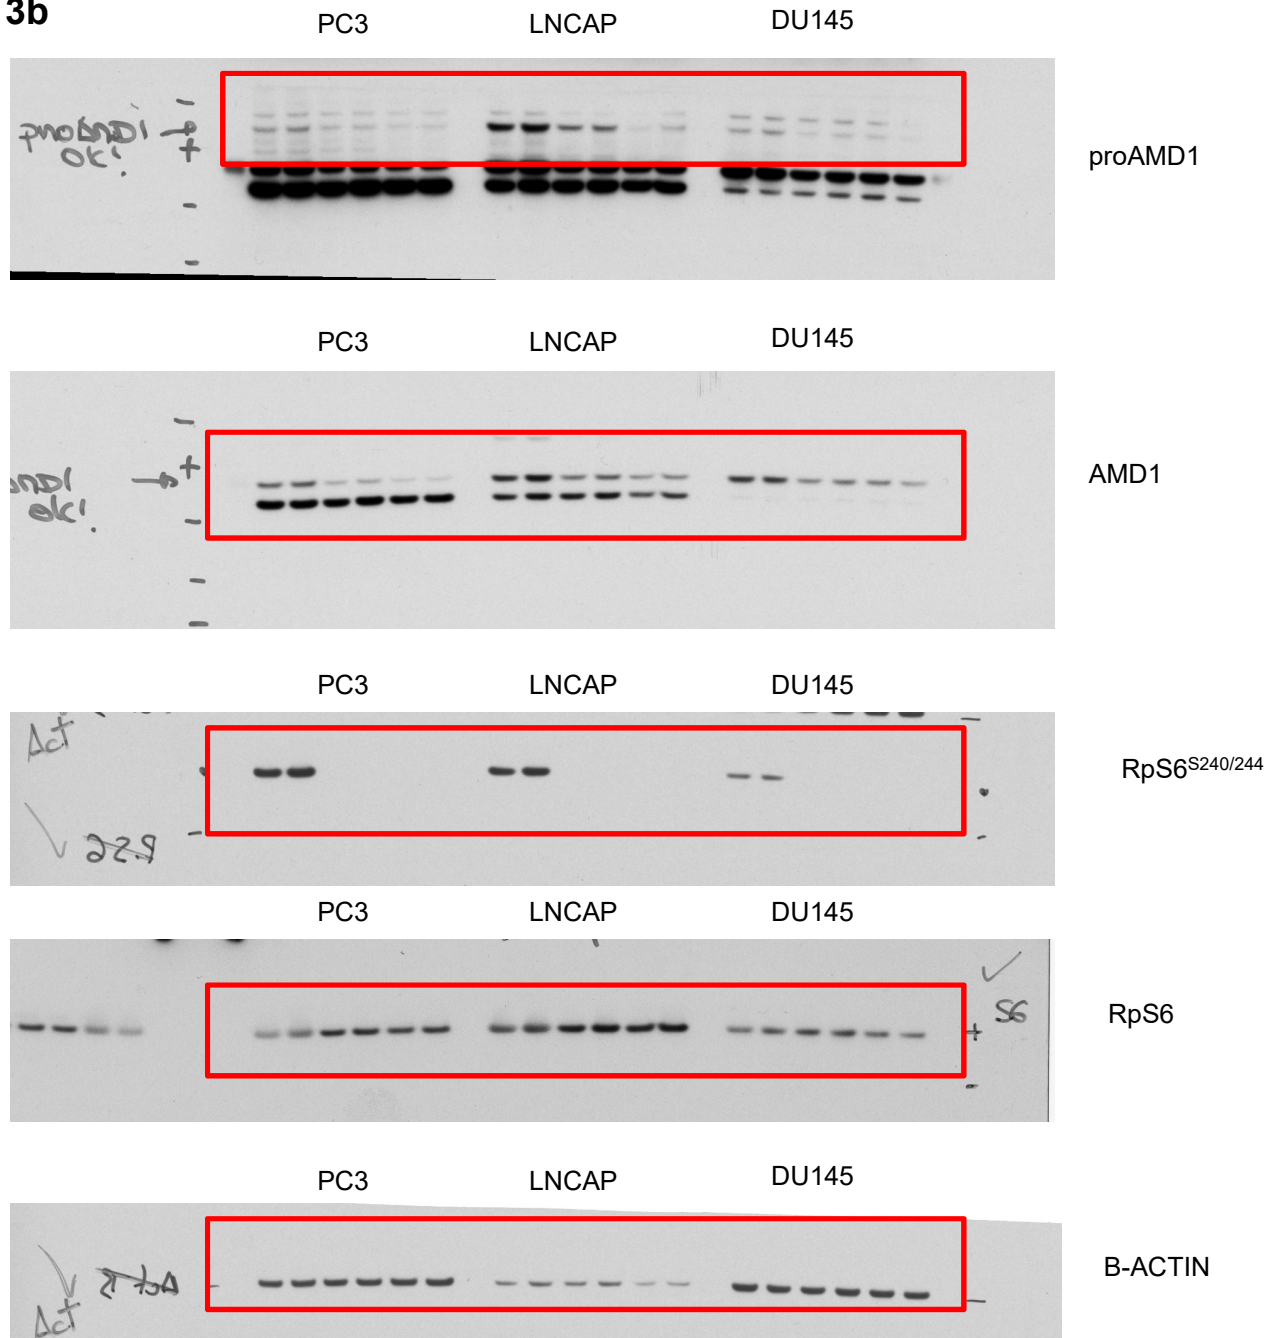

Fig 3e

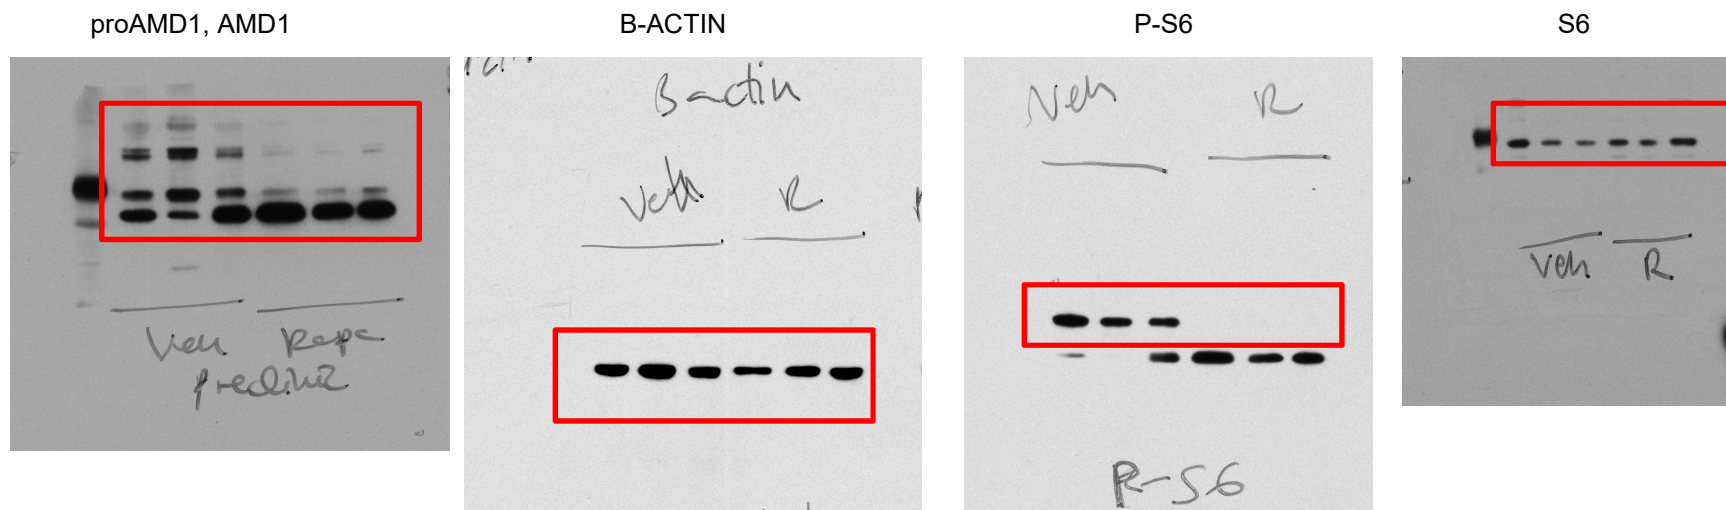

Fig 4a

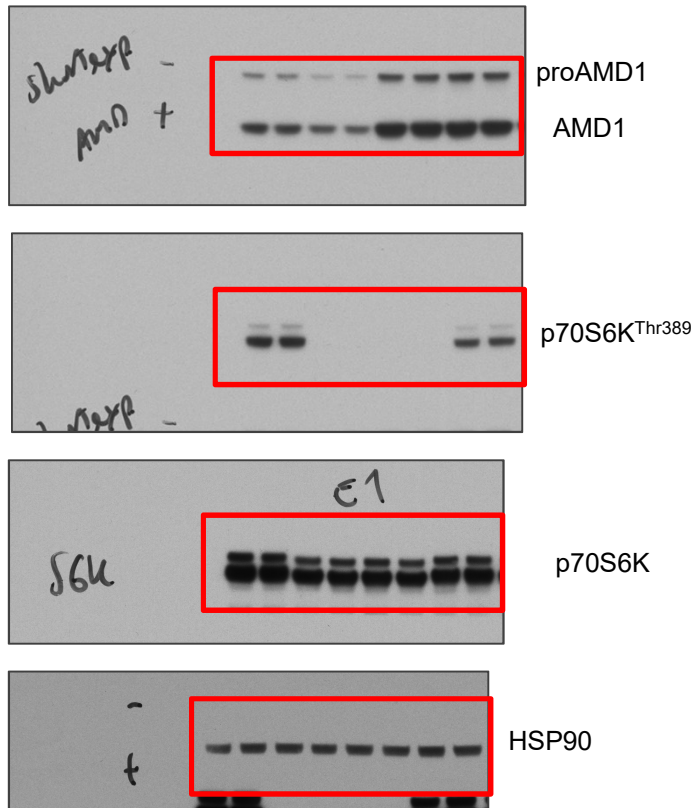

Fig 4c

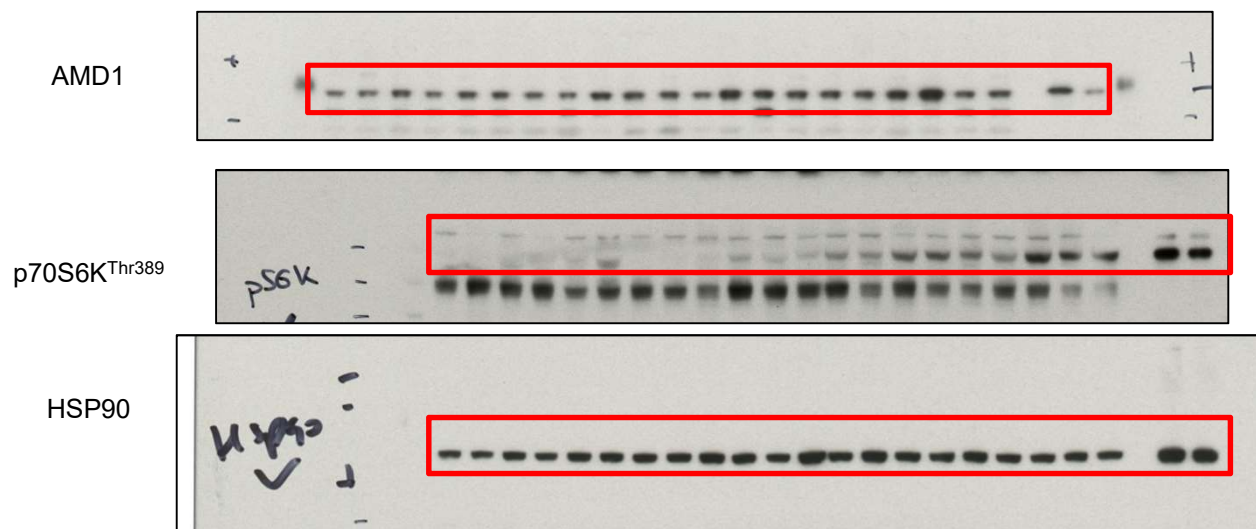



Fig S3a

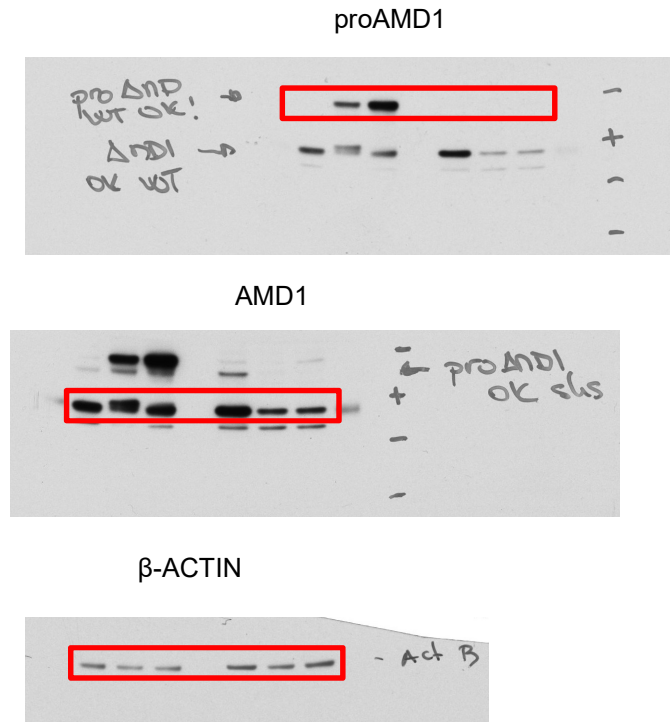

Fig S3e

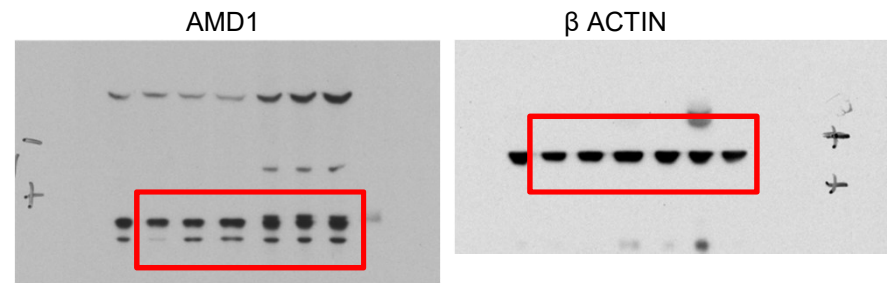

Fig S3h

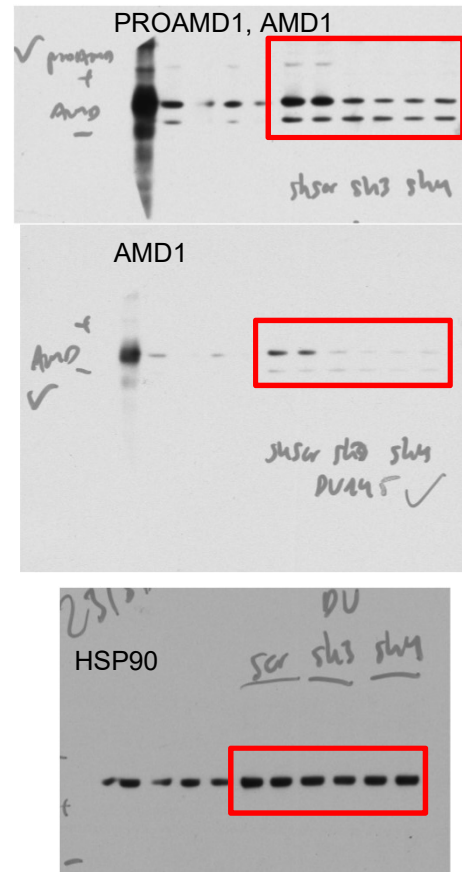

Fig S3j

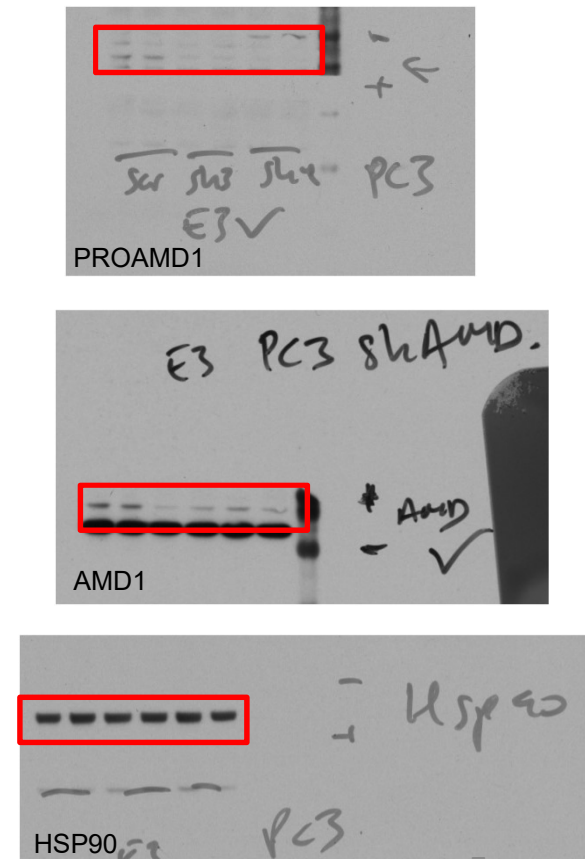

Fig S4a

AMD1

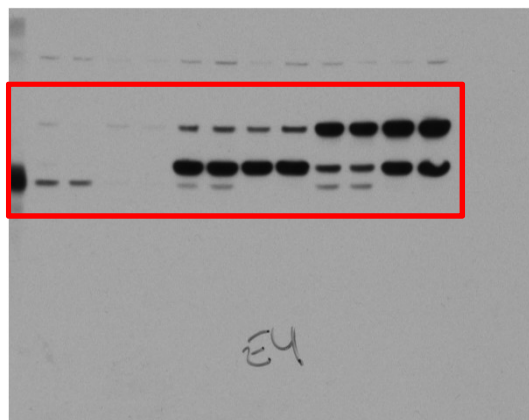

HSP90

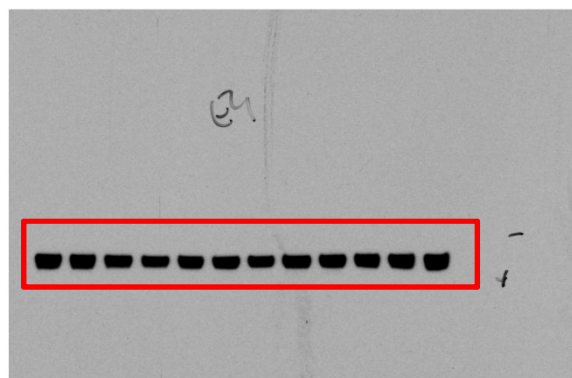



Fig S5d

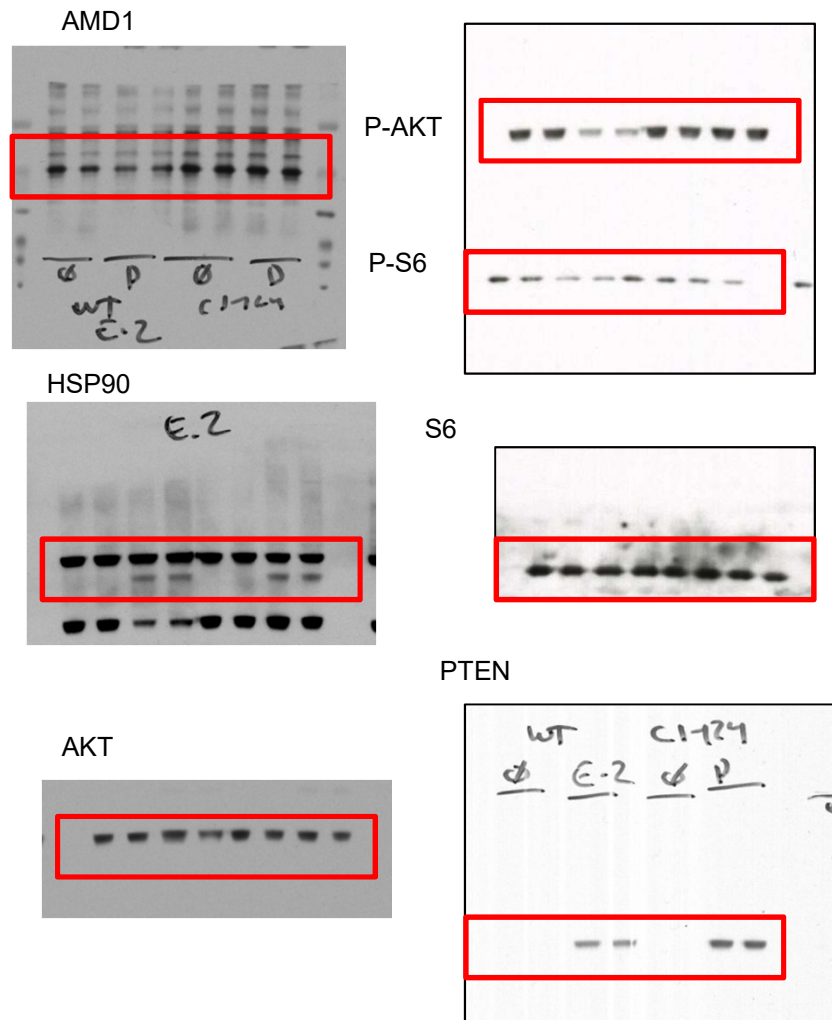

Fig S5h

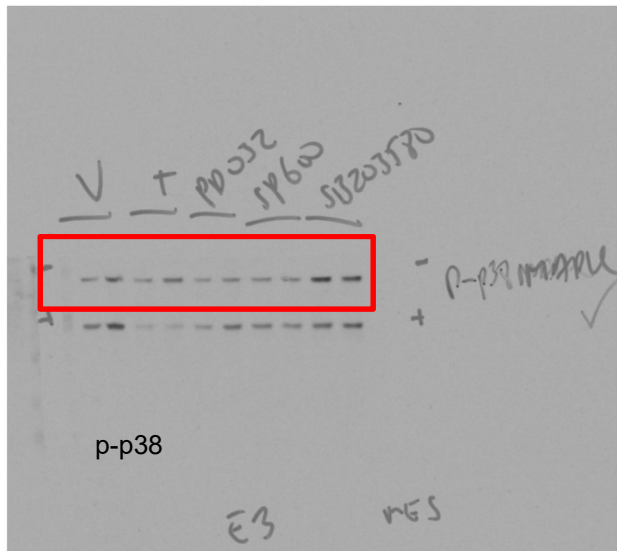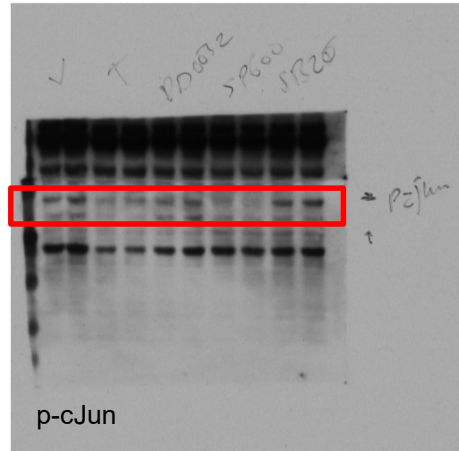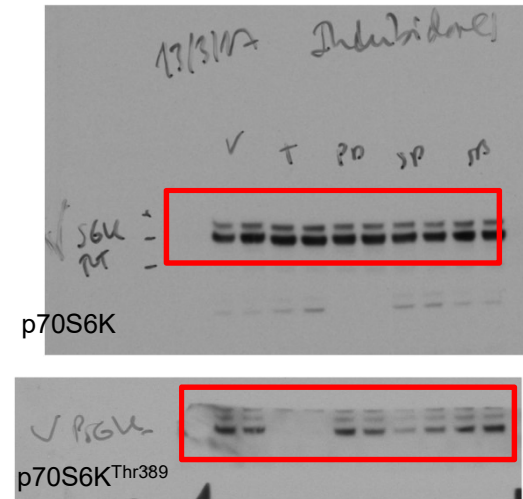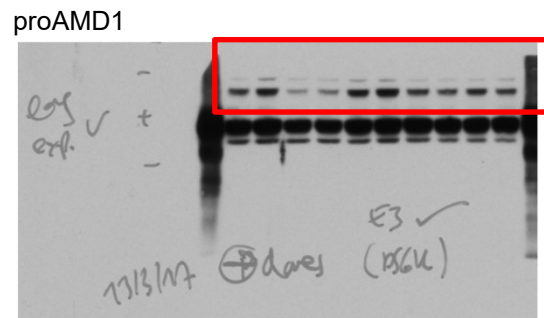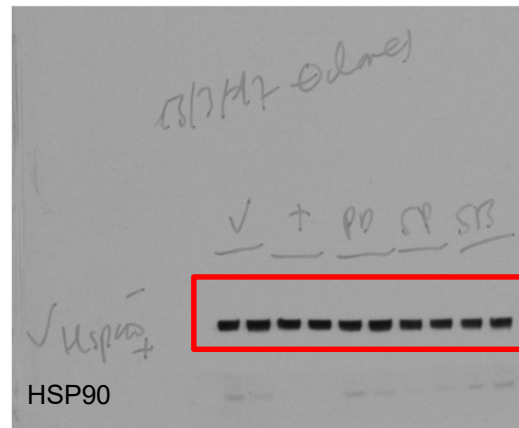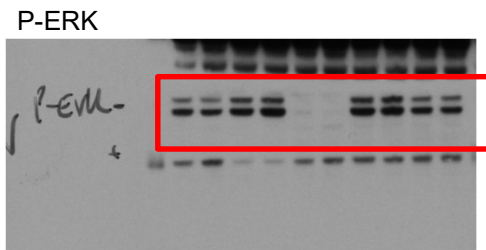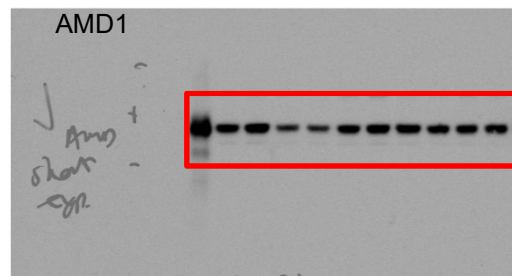

Fig S5i

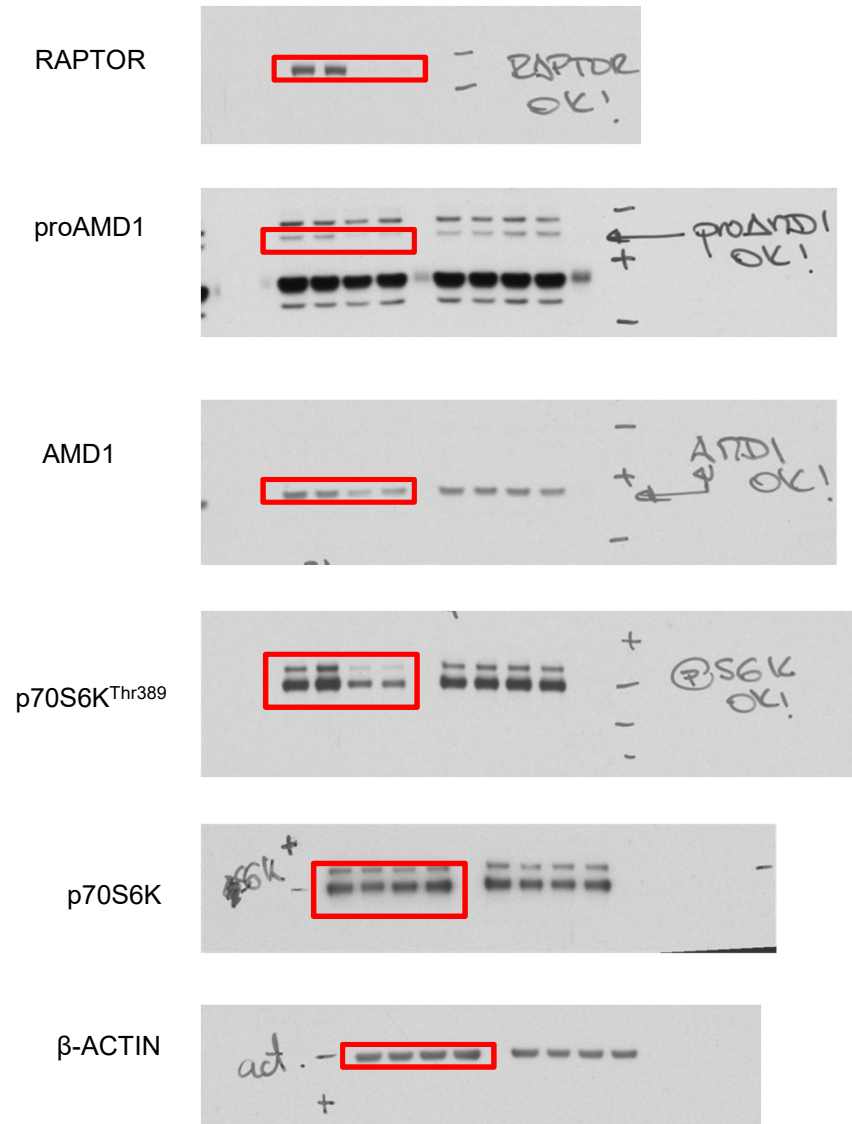

Fig S5j

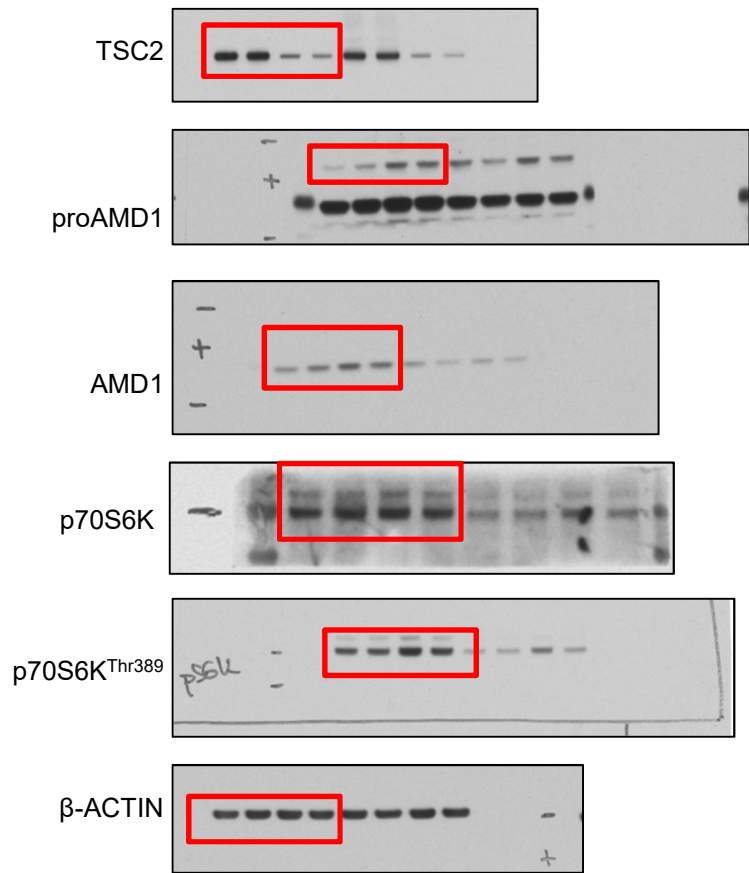

Fig S6e

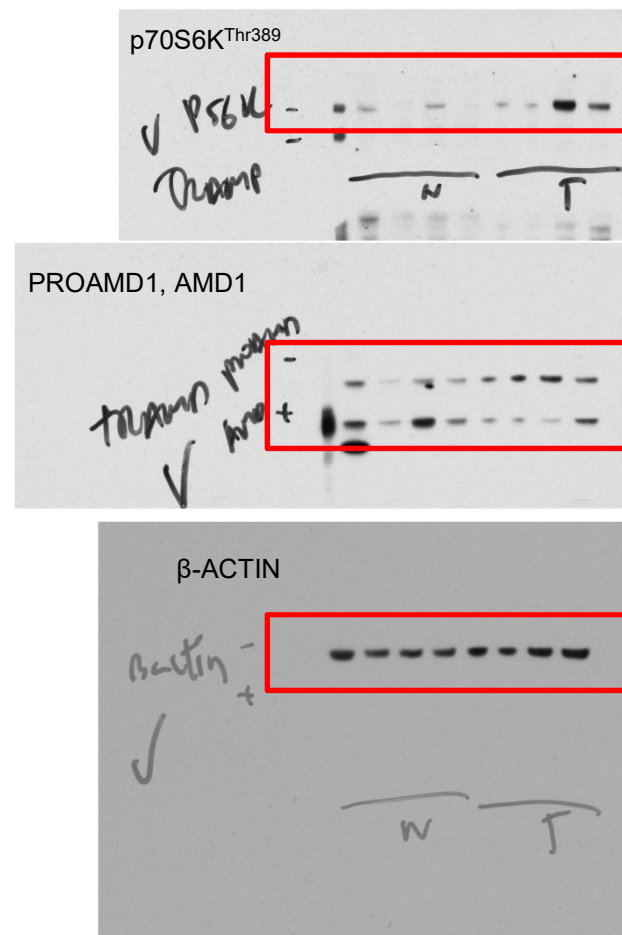

Fig. S7e

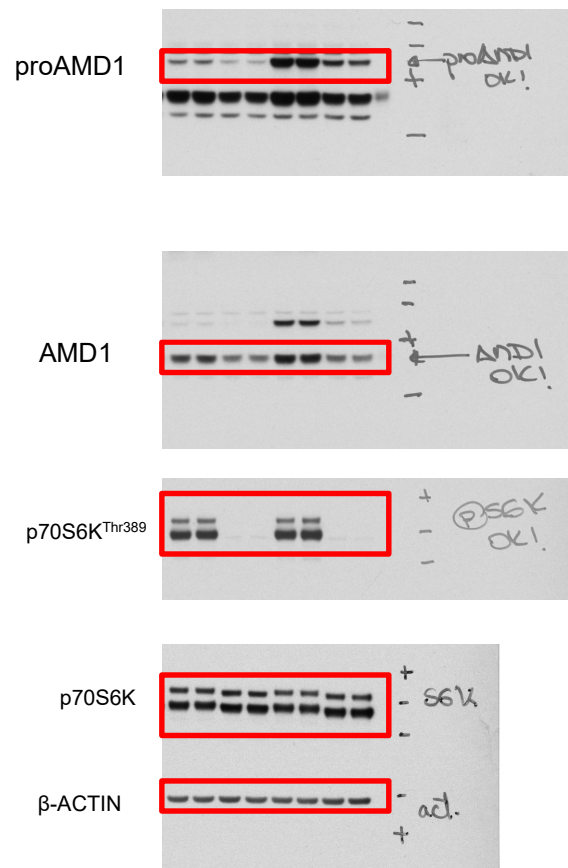

Fig. S7f

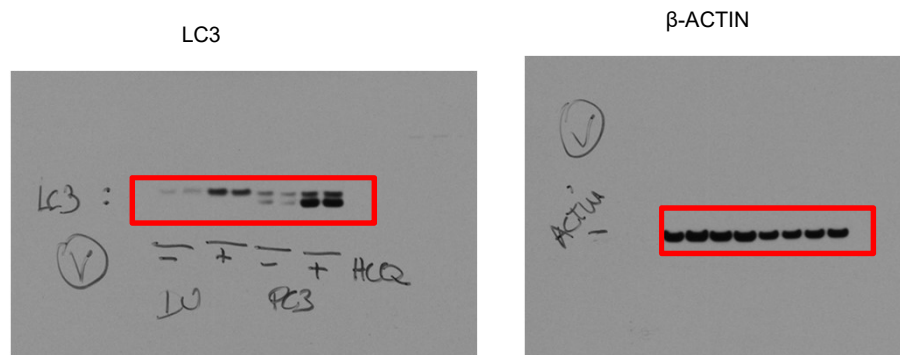

**Fig. S7h**

proAMD1

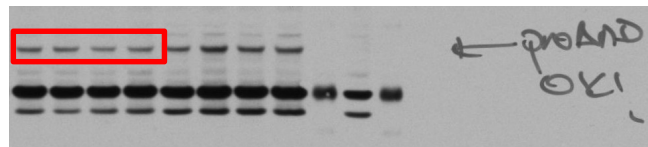

AMD1

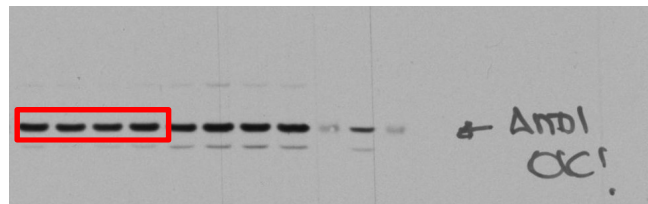

p70S6K<sup>Thr389</sup>

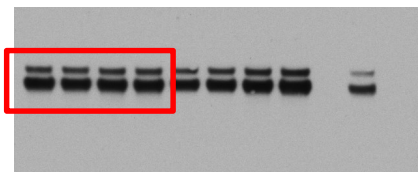

p70S6K

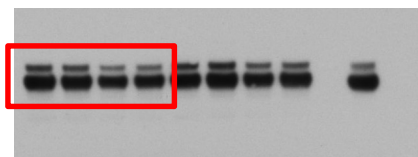

RpS6<sup>S240/244</sup>

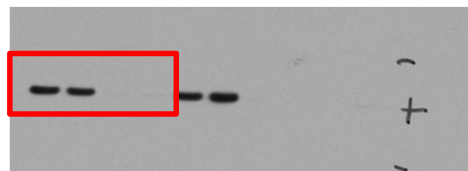

RpS6

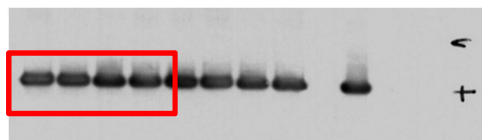

β-ACTIN

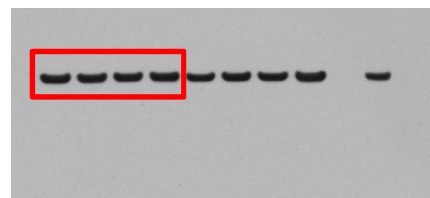

Fig. S7i

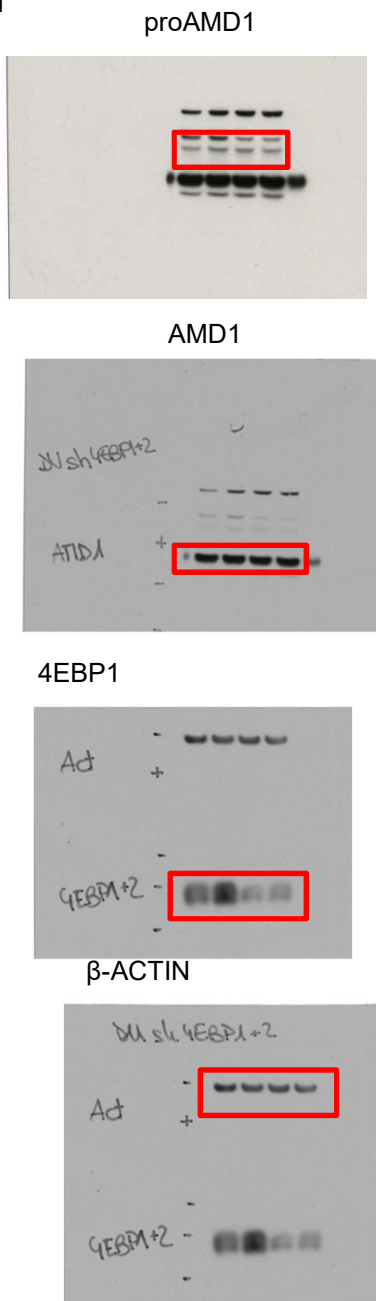

Fig. S8b

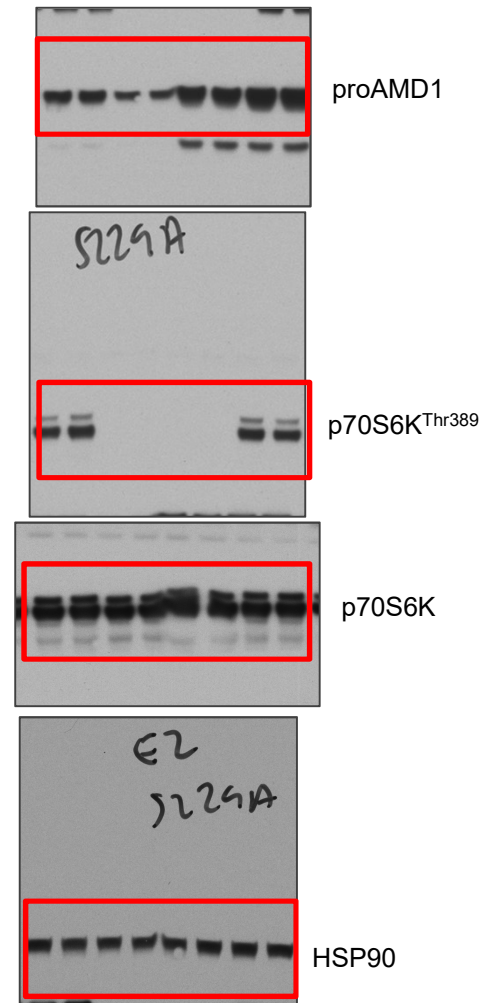



Fig S8g

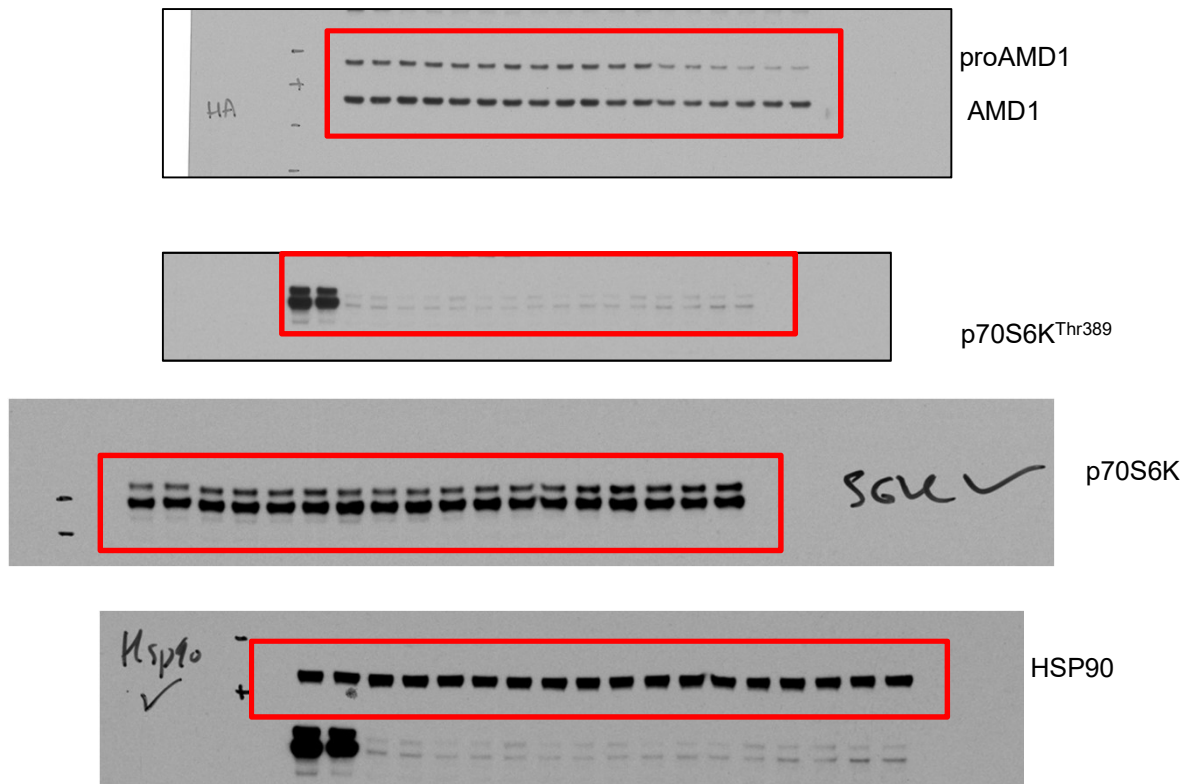

Fig S8h

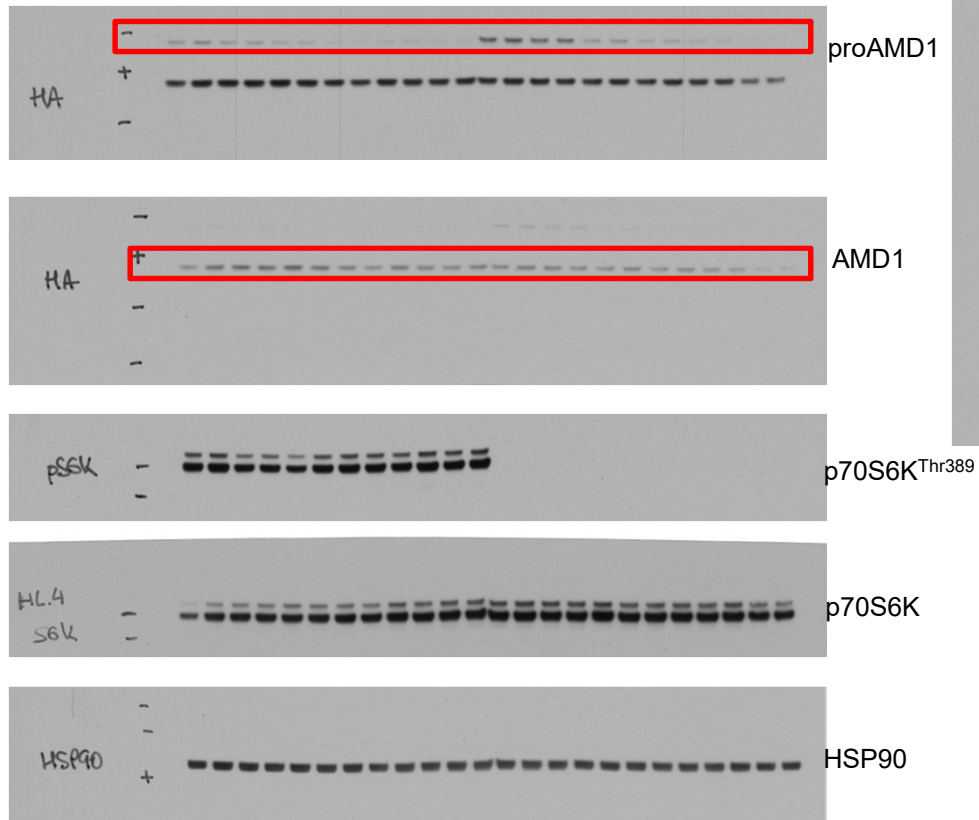

Fig S8j

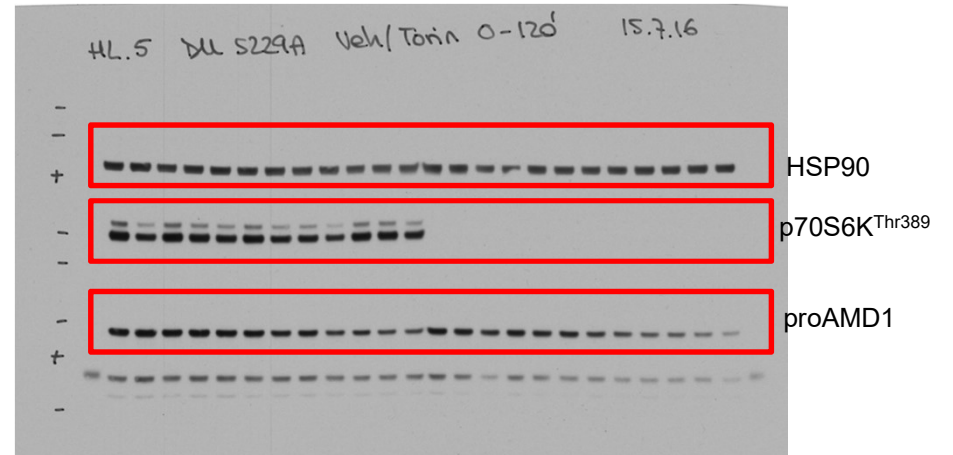

Fig s9a

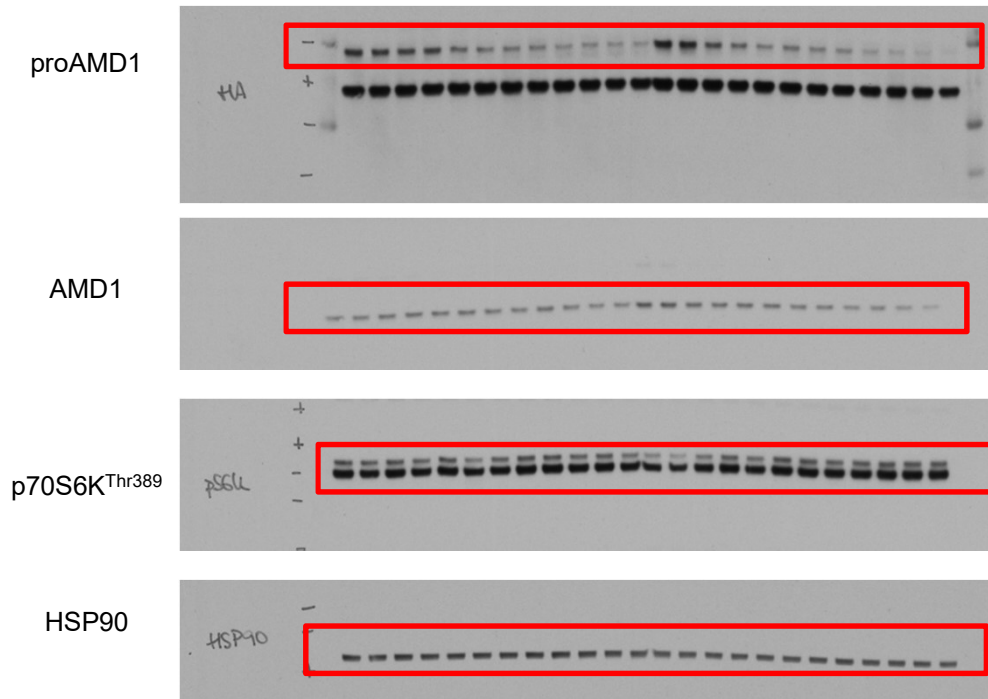

Fig S9c

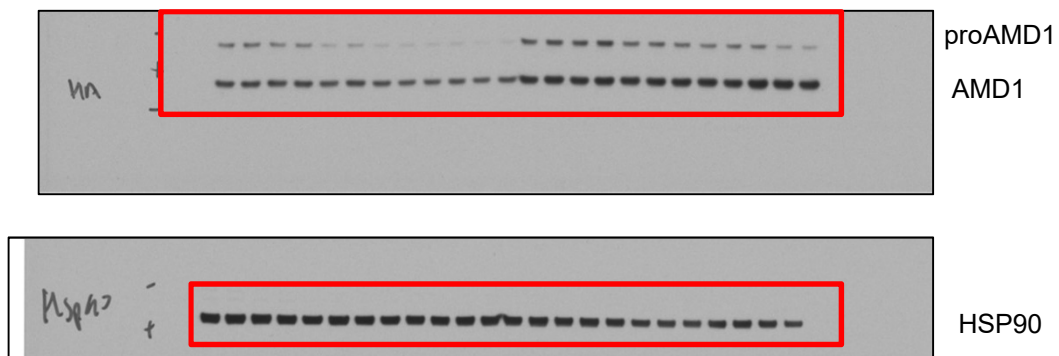

Fig S9d

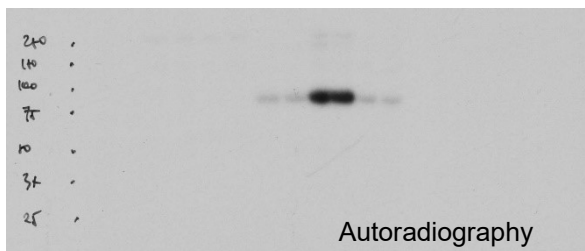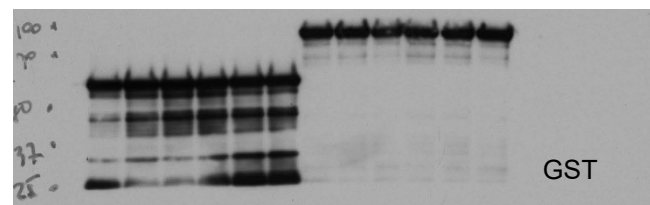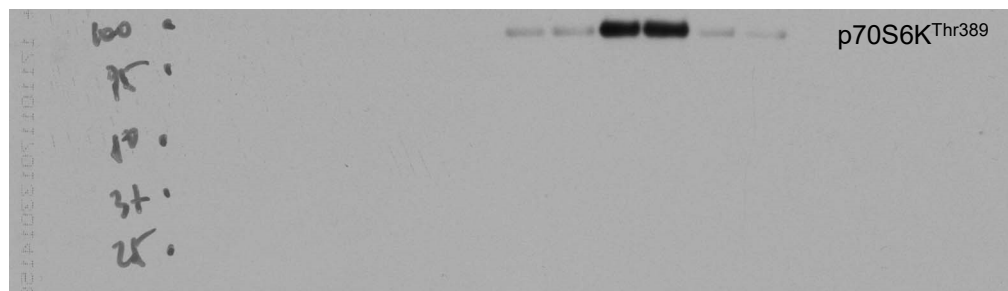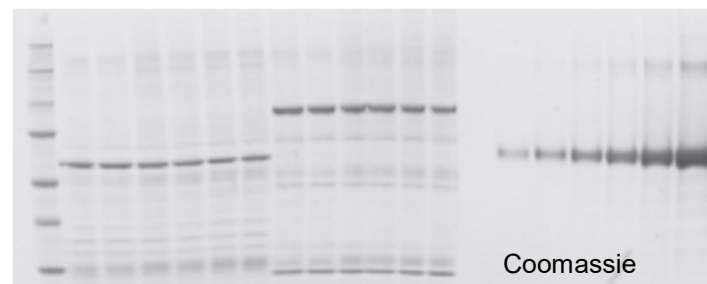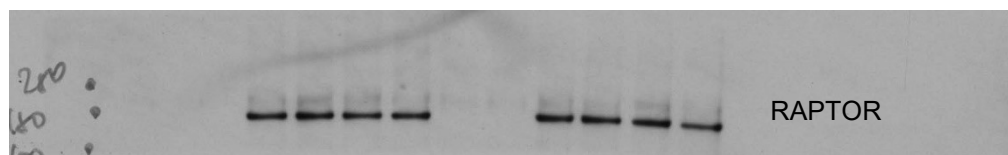

Supplement: NIHMS72672-supplement-Source_data__unprocessed_scans.pdf [file NIHMS72672-supplement-Source_data__unprocessed_scans.pdf]
